# Supplementary material for: Unwinding the SARS-CoV-2 Ribosomal Frameshifting Pseudoknot with LNA and G-Clamp-Modified Phosphorothioate Oligonucleotides Inhibits Viral Replication
Source: MDPI journal article supplement (doi:10.3390/biom13111660), 2023-11-17
Supplement: s1 [file s1]

## Supplementary Materials

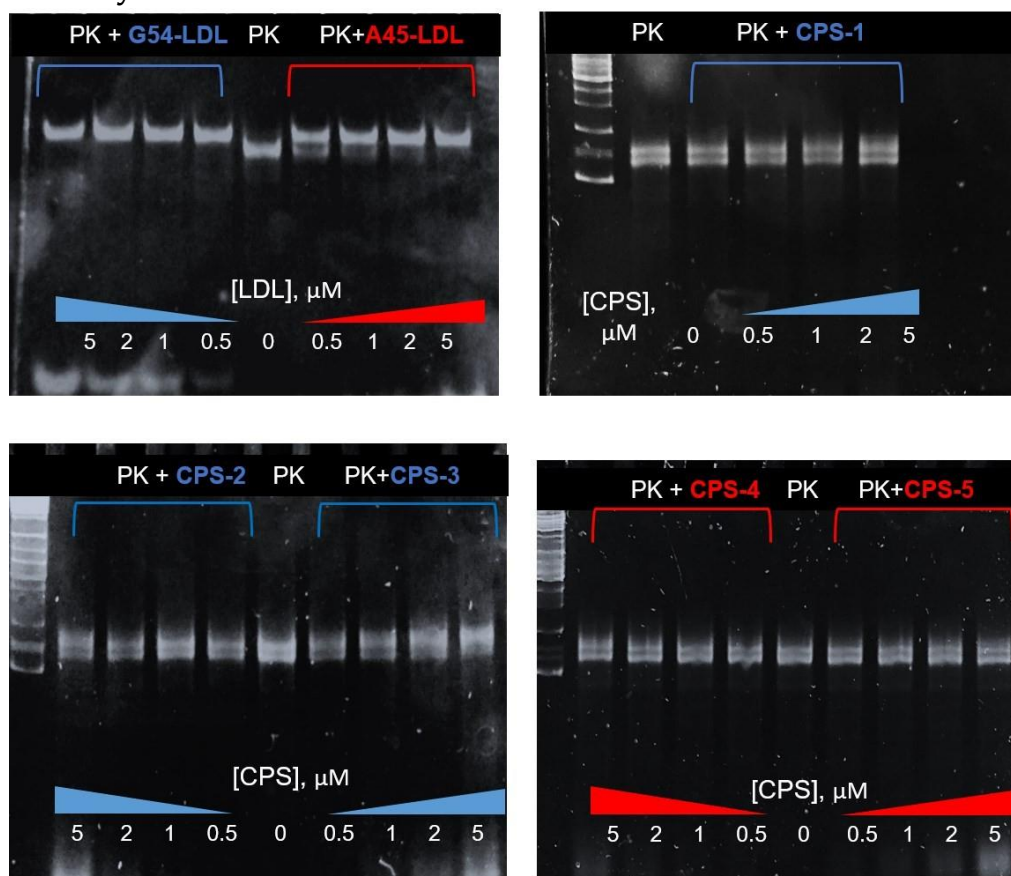

**Figure S1.** EMSA of PK in the presence of site 1-targeting (blue) or site 2-targeting (red) LNA-DNA-LNA gapmers (LDL) and G-clamp-harboring phosphorothioates (CPS).

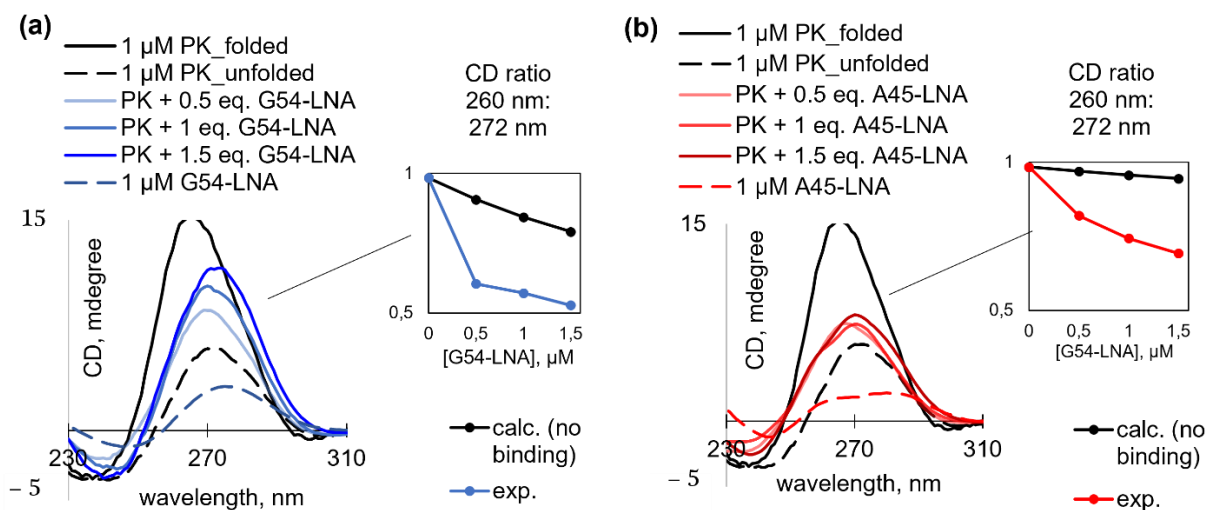

**Figure S2.** Verification of PK unwinding by LNA using CD spectroscopy. **(a)** Titration of 1 $\mu$ M PK with site 1-targeting G54-LNA (blue). **(b)** Titration of 1 $\mu$ M PK with site 2-targeting A45-LNA (red). CD changes upon LDL-PK interactions and those predicted (calc) for the mixtures with non-binding oligonucleotides.

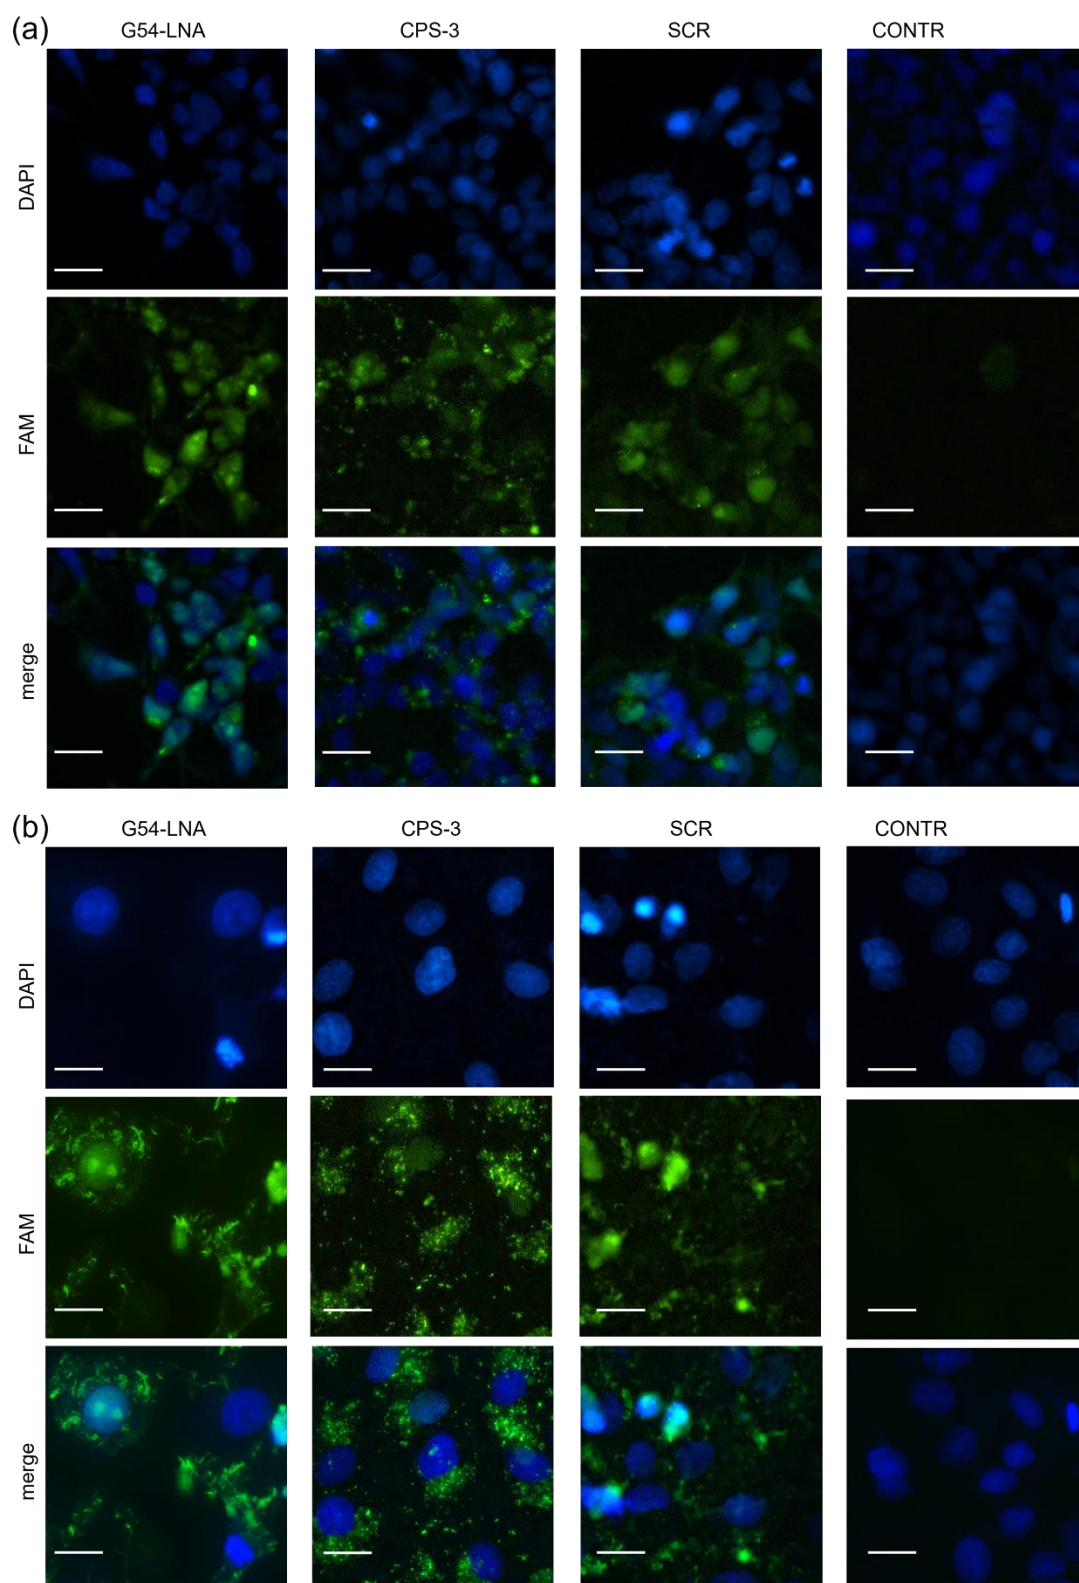

**Figure S3.** Distribution of AS ONs in HEK293T-ACE2 (a) and GBM6138 (b) cells. Scale bars: 20  $\mu$ m.
